# Supplementary material for: Implementation of QbD strategies in the inoculum expansion of a mAb production process
Source: PubMed Central journal article supplement (PMC7923587; doi:10.1002/elsc.202000056), 2020-12-03
Supplement: ELSC-21-196-s001.pdf [file ELSC-21-196-s001.pdf]

## Supplements

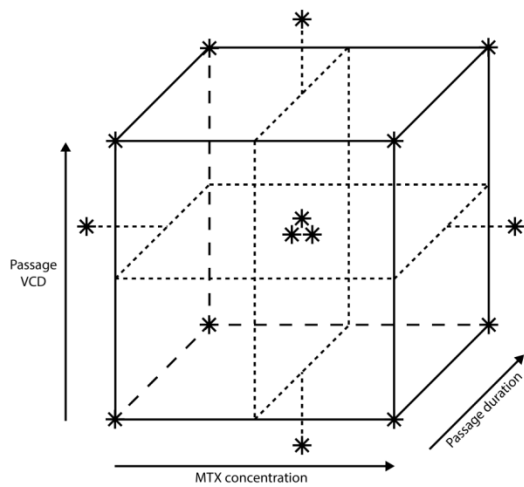

**Figure S1.** Schematic representation of the conducted central composite design for the Passage viable cell density, the MTX concentration and the passage duration. The eight corner points represent the -1/1 levels. The three stars in the middle of the cube represent the replicate centre-point runs (0 level). The outer stars represent the -2/2 levels for two of the three parameters.

**Table S1.** Risk assessment and FMEA results.

| Process Parameter         | Probability | Severity | Detection | RPN |
|---------------------------|-------------|----------|-----------|-----|
| MTX concentration         | 1           | 5        | 4         | 20  |
| Passage duration          | 3           | 3        | 2         | 18  |
| Passage VCD               | 2           | 2        | 4         | 16  |
| pH                        | 2           | 3        | 2         | 12  |
| Thaw temperature          | 2           | 3        | 2         | 12  |
| Thaw duration             | 2           | 2        | 3         | 12  |
| Osmolality                | 1           | 3        | 3         | 9   |
| Media storage temperature | 1           | 4        | 2         | 8   |
| Media storage time        | 1           | 4        | 2         | 8   |
| Initial VCD               | 1           | 2        | 4         | 8   |
| Type of cryo conservation | 1           | 3        | 2         | 6   |
| Media temperature         | 1           | 3        | 2         | 6   |
| Cell line                 | 1           | 5        | 1         | 5   |
| Temperature               | 1           | 5        | 1         | 5   |
| Incubator CO <sub>2</sub> | 1           | 4        | 1         | 4   |
| Agitation speed           | 1           | 4        | 1         | 4   |
| Incubator humidity        | 1           | 3        | 1         | 3   |
| Non-/baffled flasks       | 1           | 3        | 1         | 3   |
| Working volume            | 1           | 2        | 1         | 2   |

**Table S2.** Numerical coding of varied process parameters.

|                                               | -2  | -1   | 0   | 1    | 2   |
|-----------------------------------------------|-----|------|-----|------|-----|
| <b>MTX concentration [nM]</b>                 | 0   | 7.5  | 15  | 22.5 | 30  |
| <b>Passage duration [d]</b>                   | -   | 2    | 3,2 | 5    | -   |
| <b>Passage VCD [x10<sup>6</sup> cells/ml]</b> | 0.1 | 0.15 | 0.2 | 0.25 | 0.3 |

**Table S3.** Experimental set up and responses for the DoE.

| Experiment number | MTX Concentration | Passage Duration | Passage VCD | Inoculum Viability [%] | Inoculum Growth Rate [1/d] | Production Viability [%] | Production Growth Rate [1/d] | Total mAb Titer [g/l] | Specific mAb Titer [g/l*(10 <sup>6</sup> cells*d/ml) <sup>-1</sup> ] |
|-------------------|-------------------|------------------|-------------|------------------------|----------------------------|--------------------------|------------------------------|-----------------------|----------------------------------------------------------------------|
| 1                 | -1                | -1               | -1          | 98.5                   | 0.96                       | 98.6                     | 0.57                         | 1.10                  | 14.78                                                                |
| 2                 | 1                 | -1               | -1          | 98.6                   | 0.92                       | 98.1                     | 0.56                         | 1.12                  | 16.41                                                                |
| 3                 | -1                | 1                | -1          | 97.9                   | 0.75                       | 97.1                     | 0.55                         | 1.06                  | 16.57                                                                |
| 4                 | 1                 | 1                | -1          | 98.0                   | 0.79                       | 97.3                     | 0.51                         | 1.04                  | 17.32                                                                |
| 5                 | -1                | -1               | 1           | 98.7                   | 0.86                       | 98.7                     | 0.56                         | 1.11                  | 17.26                                                                |
| 6                 | 1                 | -1               | 1           | 98.7                   | 0.87                       | 98.0                     | 0.55                         | 1.09                  | 16.47                                                                |
| 7                 | -1                | 1                | 1           | 97.4                   | 0.69                       | 97.3                     | 0.49                         | 0.98                  | 20.87                                                                |
| 8                 | 1                 | 1                | 1           | 96.6                   | 0.68                       | 96.6                     | 0.44                         | 0.82                  | 23.30                                                                |
| 9                 | -2                | 0                | 0           | 98.8                   | 0.90                       | 98.7                     | 0.57                         | 1.19                  | 16.72                                                                |
| 10                | 2                 | 0                | 0           | 98.4                   | 0.82                       | 98.2                     | 0.52                         | 1.01                  | 19.03                                                                |
| 11                | 0                 | 0                | -2          | 98.2                   | 0.79                       | 97.4                     | 0.48                         | 0.99                  | 20.21                                                                |
| 12                | 0                 | 0                | 2           | 97.9                   | 0.72                       | 97.4                     | 0.48                         | 0.90                  | 19.58                                                                |
| 13                | 0                 | 0                | 0           | 98.9                   | 0.89                       | 98.3                     | 0.55                         | 1.16                  | 17.12                                                                |
| 14                | 0                 | 0                | 0           | 98.5                   | 0.88                       | 98.2                     | 0.57                         | 1.06                  | 16.11                                                                |
| 15                | 0                 | 0                | 0           | 98.8                   | 0.87                       | 98.6                     | 0.55                         | 1.08                  | 17.08                                                                |

**Table S4.** Model statistics for the inoculum expansion and production process responses

|                               | R <sup>2</sup> | R <sup>2</sup> <sub>adj</sub> | Q <sup>2</sup> | p-value  | Reproducibility |
|-------------------------------|----------------|-------------------------------|----------------|----------|-----------------|
| <b>Inoculum viability</b>     | 0.95           | 0.91                          | 0.79           | 0.0001   | 0.90            |
| <b>Inoculum growth rate</b>   | 0.99           | 0.98                          | 0.96           | < 0.0001 | 0.99            |
| <b>Production viability</b>   | 0.89           | 0.81                          | 0.62           | 0.0019   | 0.87            |
| <b>Production growth rate</b> | 0.99           | 0.90                          | 0.69           | < 0.0001 | 0.92            |
| <b>Total mAb titer</b>        | 0.93           | 0.88                          | 0.70           | 0.0003   | 0.71            |
| <b>Specific mAb titer</b>     | 0.94           | 0.914                         | 0.827          | < 0.0001 | 0.90            |
